# Supplementary material for: Seasonal and spatial variations in aerosol vertical distribution andoptical properties over China from long-term satellite and groundbasedremote sensing
Source: Copernicus journal article supplement (doi:10.5194/acp-2016-749), 2016-10-04
Supplement: Supplementary file 1 [file acp-2016-749-supplement.pdf]

## Supplementary Material

### 5 **Seasonal and spatial variations in aerosol vertical distribution and optical properties over China from long-term satellite and ground-based remote sensing**

Pengfei Tian<sup>1, 2</sup>, Xianjie Cao<sup>1</sup>, Lei Zhang<sup>1\*</sup>, Naixiu Sun<sup>1</sup>, Lu Sun<sup>2</sup>, Timothy Logan<sup>2</sup>, Jinsen Shi<sup>1</sup>, Yuan Wang<sup>3</sup>, Yuemeng Ji<sup>2,4</sup>, Yun Lin<sup>2</sup>, Zhongwei Huang<sup>1</sup>, Tian Zhou<sup>1</sup>, Yingying Shi<sup>1</sup>, Renyi Zhang<sup>2\*</sup>

<sup>1</sup>Key Laboratory for Semi-Arid Climate Change of the Ministry of Education, College of Atmospheric Sciences, Lanzhou University, Lanzhou 730000, China

10 <sup>2</sup>Department of Atmospheric Sciences, Texas A&M University, College Station, Texas 77843, USA

<sup>3</sup>Jet Propulsion Laboratory, California Institute of Technology, Pasadena, California 91125, USA

<sup>4</sup>Institute of Environmental Health and Pollution Control, School of Environmental Science and Engineering, Guangdong University of Technology, Guangzhou 510006, China

*Correspondence to:* L. Zhang (zhanglei@lzu.edu.cn) and R. Zhang (renyi-zhang@tamu.edu)

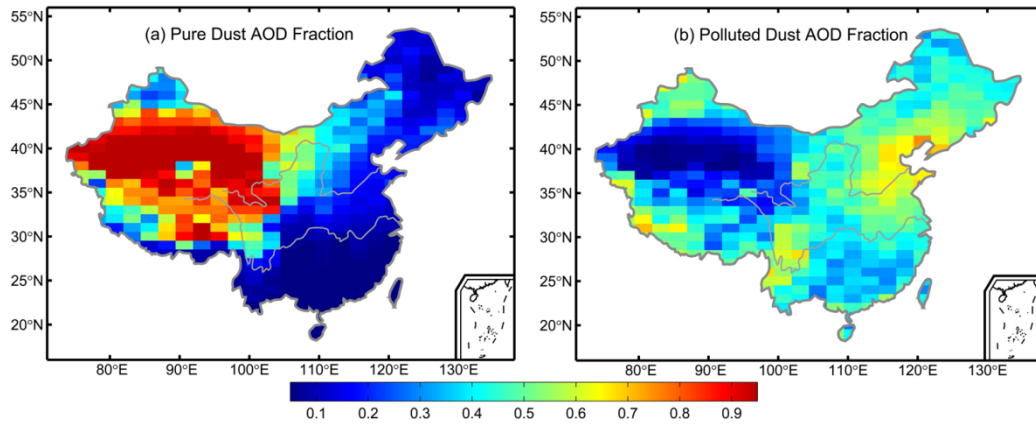

**Figure S1.** Annual pure dust and polluted dust AOD to total AOD ratio over China derived from CALIOP observations from June 2006 to January 2016, with a  $1.0 \times 2.5^\circ$  latitude-longitude grid.

5

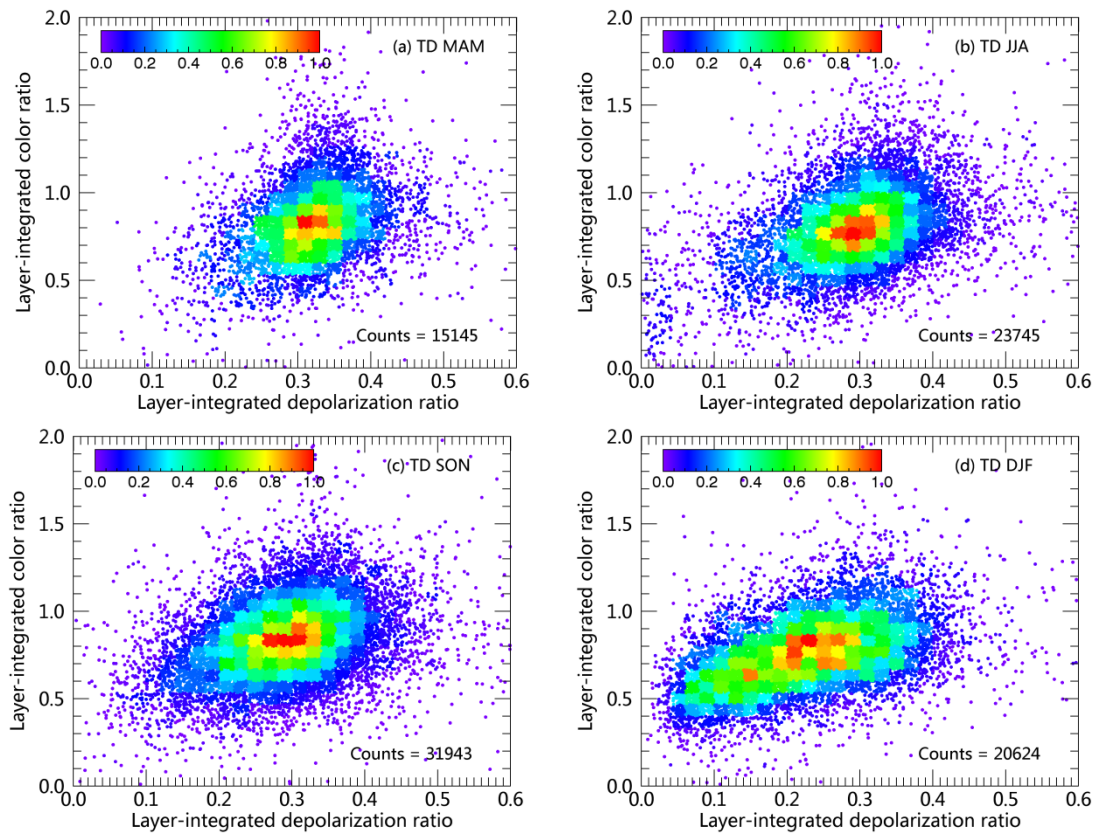

**Figure S2.** Scatter plots for the layer-integrated aerosol color ratios versus the layer-integrated aerosol depolarization ratios over the Taklimakan Desert (TD) region (a) spring; (b) summer; (c) autumn; (d) winter.

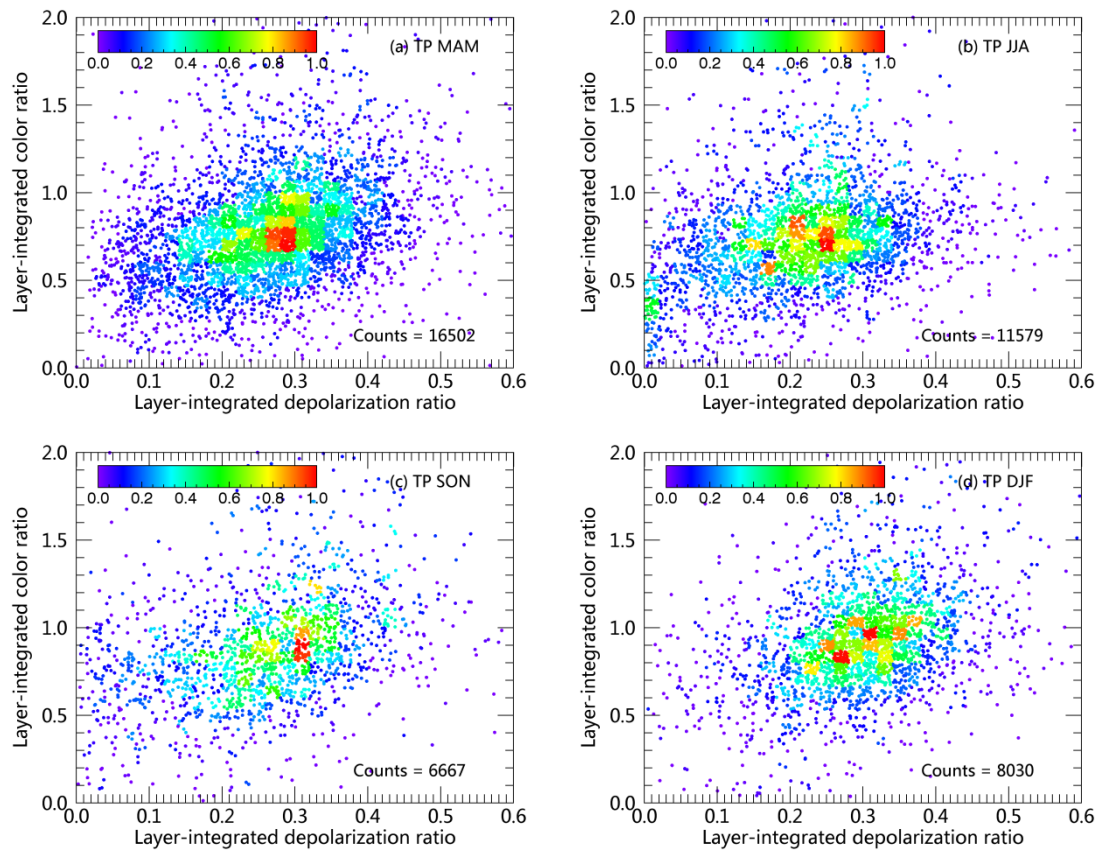

**Figure S3.** Scatter plots for the layer-integrated aerosol color ratios versus the layer-integrated aerosol depolarization ratios over the Tibetan Plateau (TP) region (a) spring; (b) summer; (c) autumn; (d) winter.

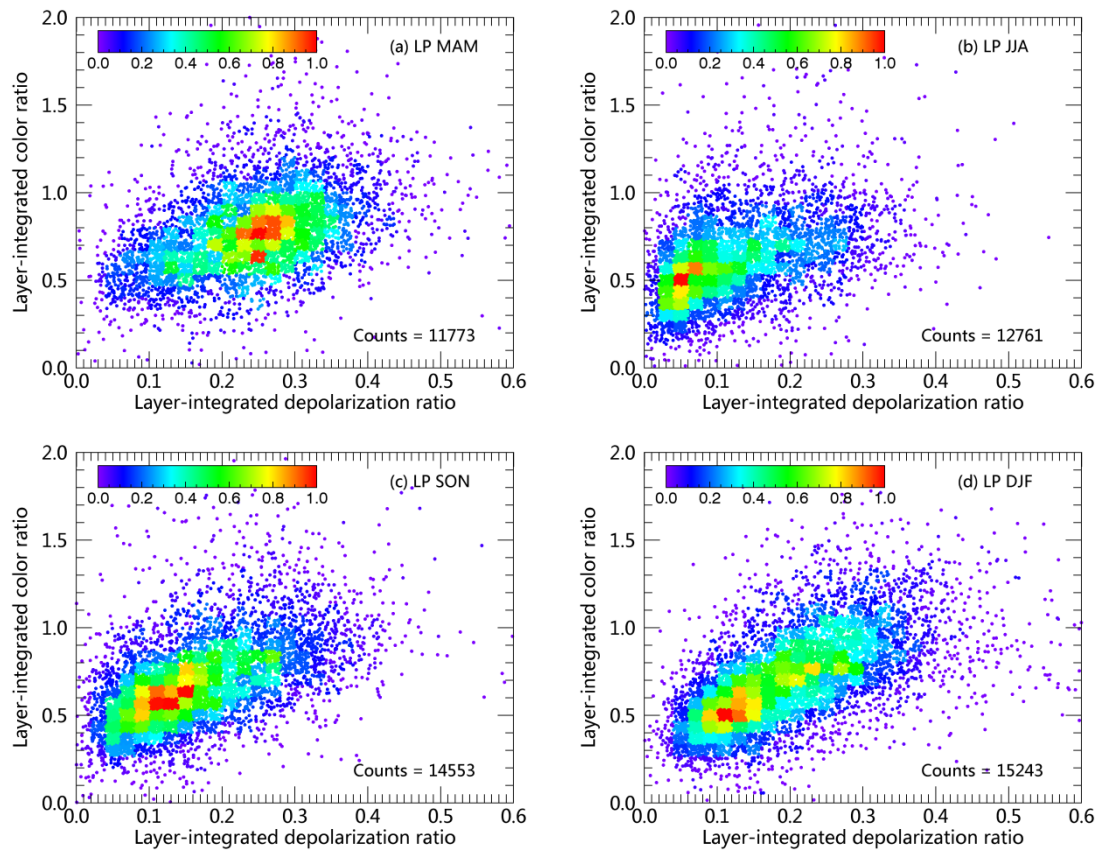

**Figure S4.** Scatter plots for the layer-integrated aerosol color ratios versus the layer-integrated aerosol depolarization ratios over the Loess Plateau (LP) region (a) spring; (b) summer; (c) autumn; (d) winter.

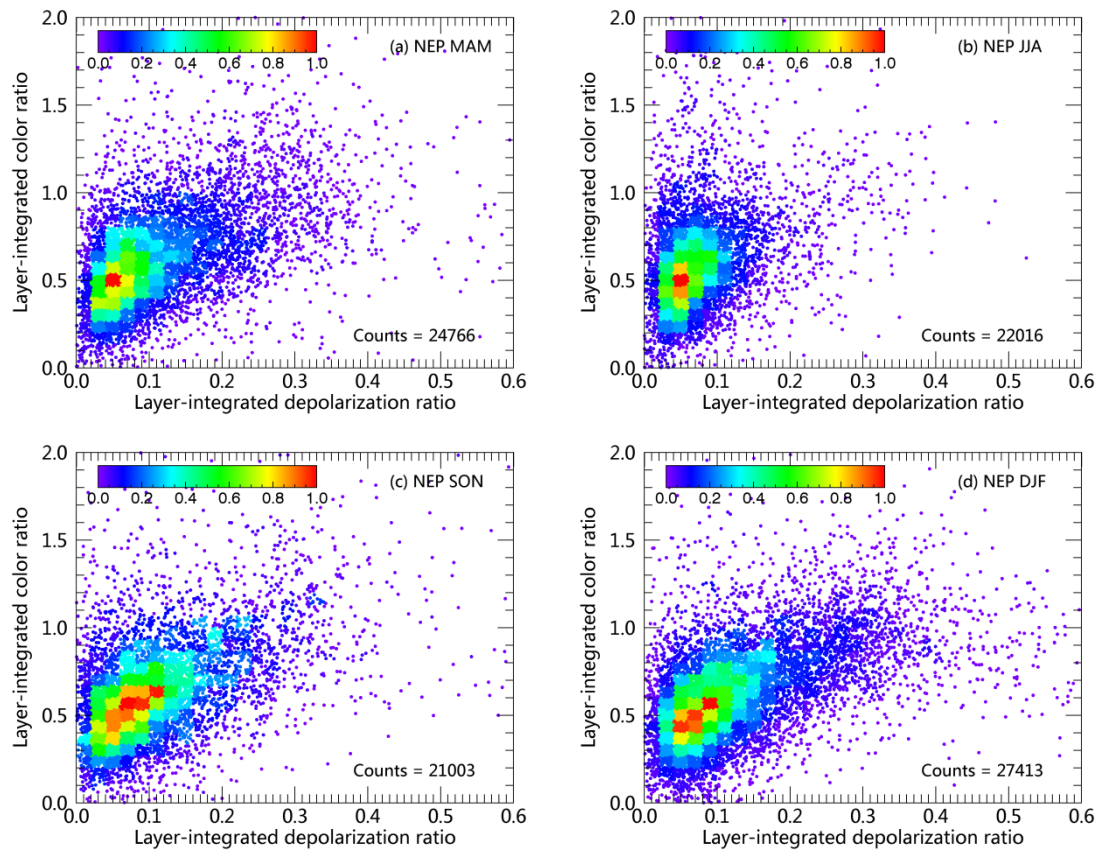

**Figure S5.** Scatter plots for the layer-integrated aerosol color ratios versus the layer-integrated aerosol depolarization ratios over the Northeast China Plain (NEP) region (a) spring; (b) summer; (c) autumn; (d) winter.

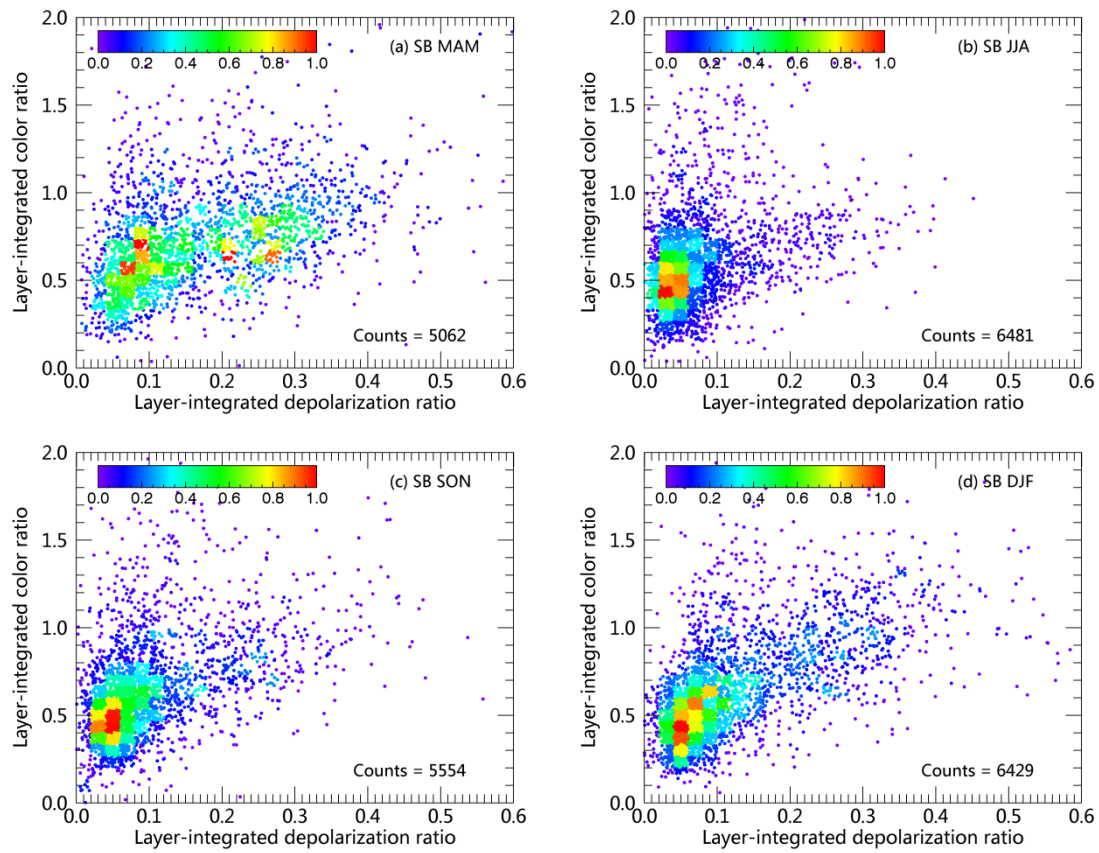

**Figure S6.** Scatter plots for the layer-integrated aerosol color ratios versus the layer-integrated aerosol depolarization ratios over the Sichuan Basin (SB) region (a) spring; (b) summer; (c) autumn; (d) winter.

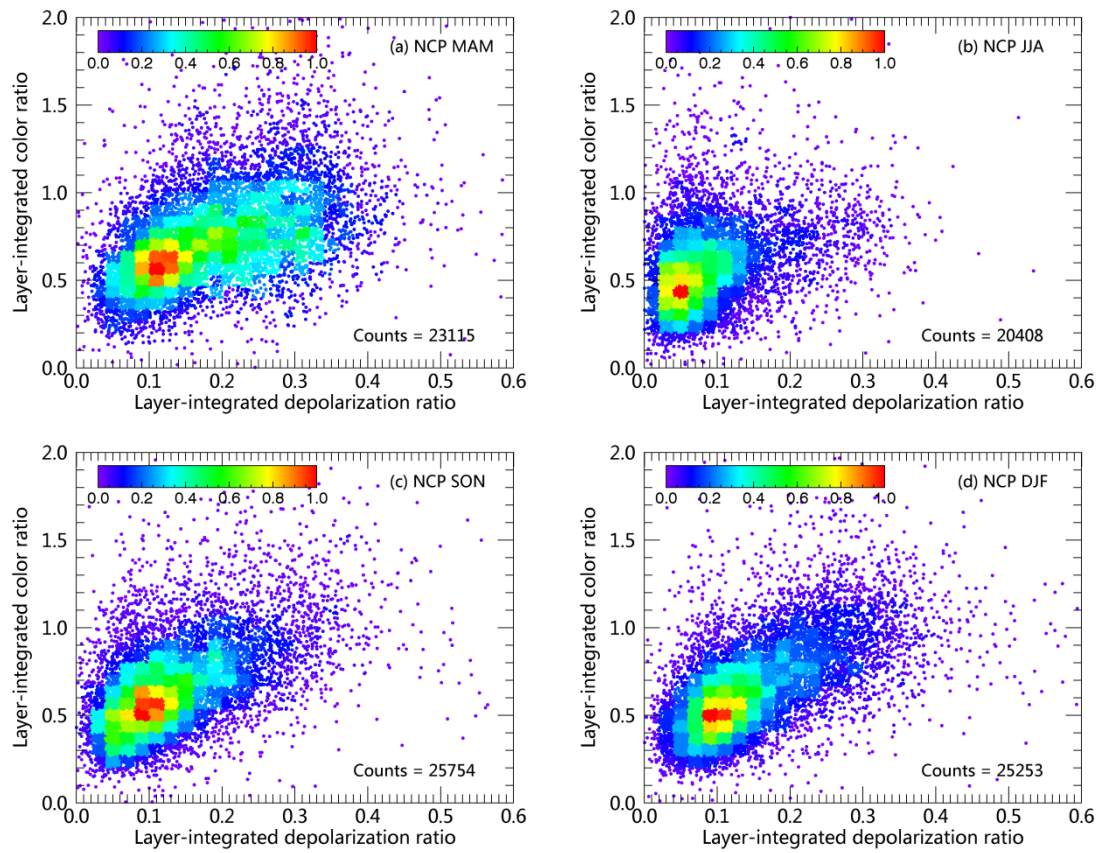

**Figure S7.** Scatter plots for the layer-integrated aerosol color ratios versus the layer-integrated aerosol depolarization ratios over the North China Plain (NCP) region (a) spring; (b) summer; (c) autumn; (d) winter.



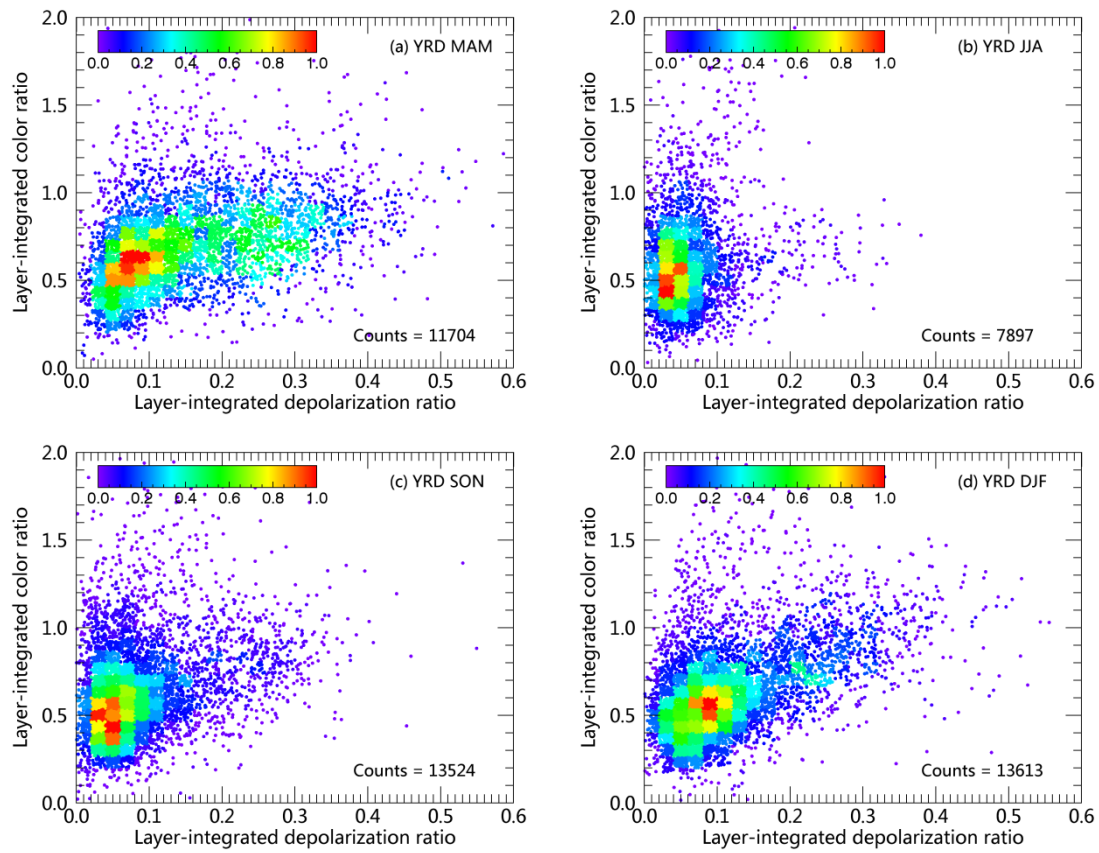

**Figure S8.** Scatter plots for the layer-integrated aerosol color ratios versus the layer-integrated aerosol depolarization ratios over the Yangtze River Delta (YRD) region (a) spring; (b) summer; (c) autumn; (d) winter.

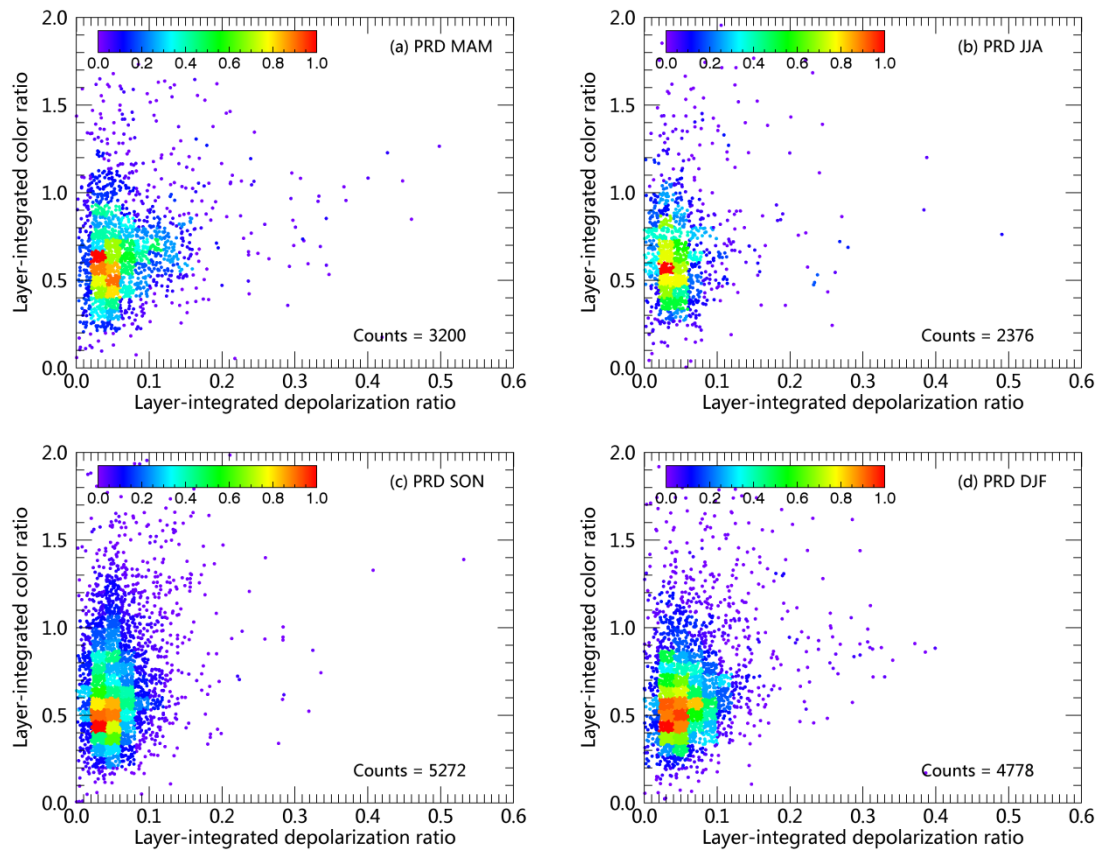

**Figure S9.** Scatter plots for the layer-integrated aerosol color ratios versus the layer-integrated aerosol depolarization ratios over the Pearl River Delta (PRD) region (a) spring; (b) summer; (c) autumn; (d) winter.
